# Supplementary material for: Polymer modified magnetic-luminescent nanocomposites for combined optical imaging and magnetic fluid hyperthermia in cancer therapy: analysis of Mn2+ doping for enhanced heating effect, hemocompatibility and biocompatibility
Source: Royal Society of Chemistry journal article supplement (doi:10.1039/d2dt00308b), 2022-01-01
Supplement: d2dt00308b1.pdf [file d2dt00308b1.pdf]

### Electronic Supplementary Information

Polymer modified magnetic-luminescent nanocomposites for combined optical imaging and magnetic fluid hyperthermia in cancer therapy: Analysis of Mn<sup>2+</sup> doping for enhanced heating effect, hemocompatibility and biocompatibility

Goutam Singh Ningombam<sup>a</sup>, Baskar Srinivasan<sup>b,c</sup>, Amrutha H. Chidananda<sup>d</sup>, Subbaraya Narayana Kalkura<sup>b</sup>, Yogendra Sharma<sup>d</sup>, Nongmaithem Rajmuhon Singh<sup>a,\*</sup>

<sup>a</sup>Department of Chemistry, Manipur University, Imphal – 795003, India

<sup>b</sup>Crystal Growth Centre, Anna University, Chennai – 600025, India

<sup>c</sup>Department of Physics, Easwari Engineering College, Chennai – 600089, India

<sup>d</sup>Centre for Cellular and Molecular Biology, Hyderabad – 500007, India

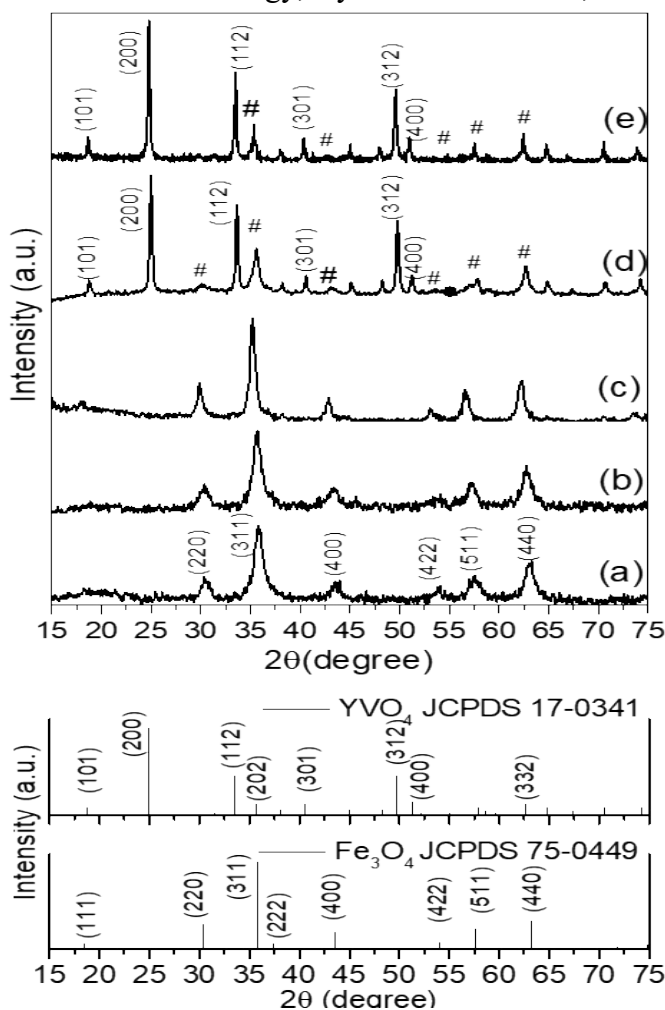

Figure S1. X-ray diffraction patterns of the samples: (a)  $\text{Fe}_3\text{O}_4$  (b)  $\text{Mn}_{0.2}\text{Fe}_{2.8}\text{O}_4$  (c)  $\text{Mn}_{0.5}\text{Fe}_{2.5}\text{O}_4$  (d)  $\text{Mn}_2\text{Dy} (\text{Mn}_{0.2}\text{Fe}_{2.8}\text{O}_4@(\text{Y,Dy})\text{VO}_4@ \text{Chitosan})$  nanocomposite and (e)  $\text{Mn}_5\text{Eu} (\text{Mn}_{0.5}\text{Fe}_{2.5}\text{O}_4@(\text{Y,Eu})\text{VO}_4@ \text{PEG})$  nanocomposite.

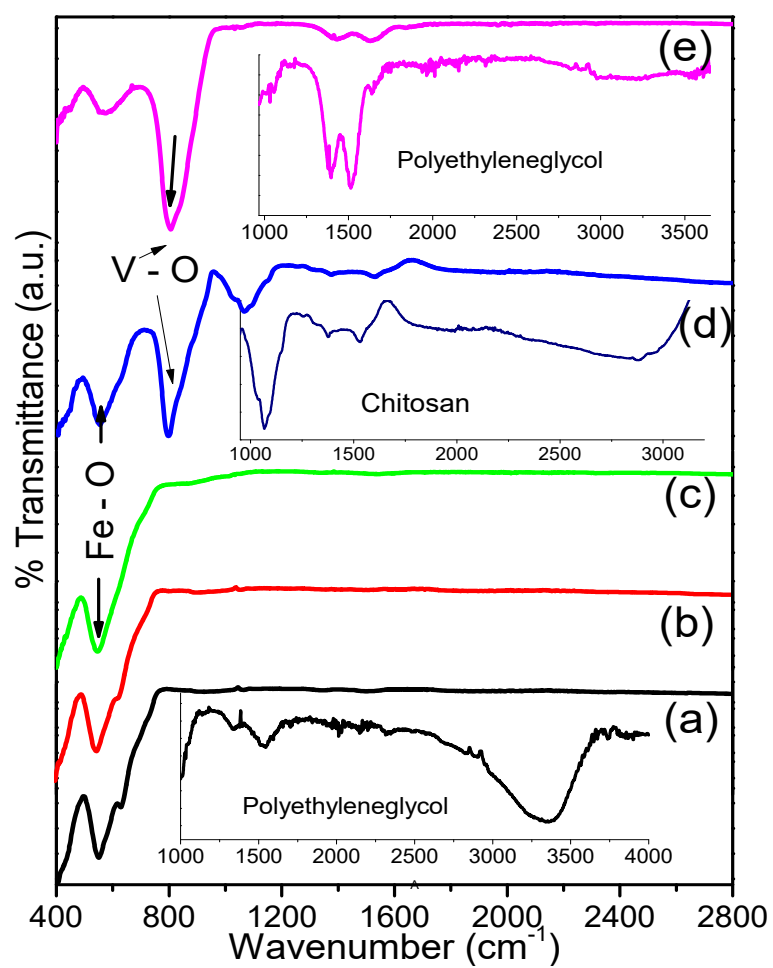

Figure S2. FT-infrared spectra of the samples: (a)  $\text{Fe}_3\text{O}_4$  (b)  $\text{Mn}_{0.2}\text{Fe}_{2.8}\text{O}_4$  (c)  $\text{Mn}_{0.5}\text{Fe}_{2.5}\text{O}_4$  (d)  $\text{Mn}_2\text{Dy}$  ( $\text{Mn}_{0.2}\text{Fe}_{2.8}\text{O}_4@(\text{Y},\text{Dy})\text{VO}_4@\text{Chitosan}$ ) and (e)  $\text{Mn}_5\text{Eu}$  ( $\text{Mn}_{0.5}\text{Fe}_{2.5}\text{O}_4@(\text{Y},\text{Eu})\text{VO}_4@\text{PEG}$ ).

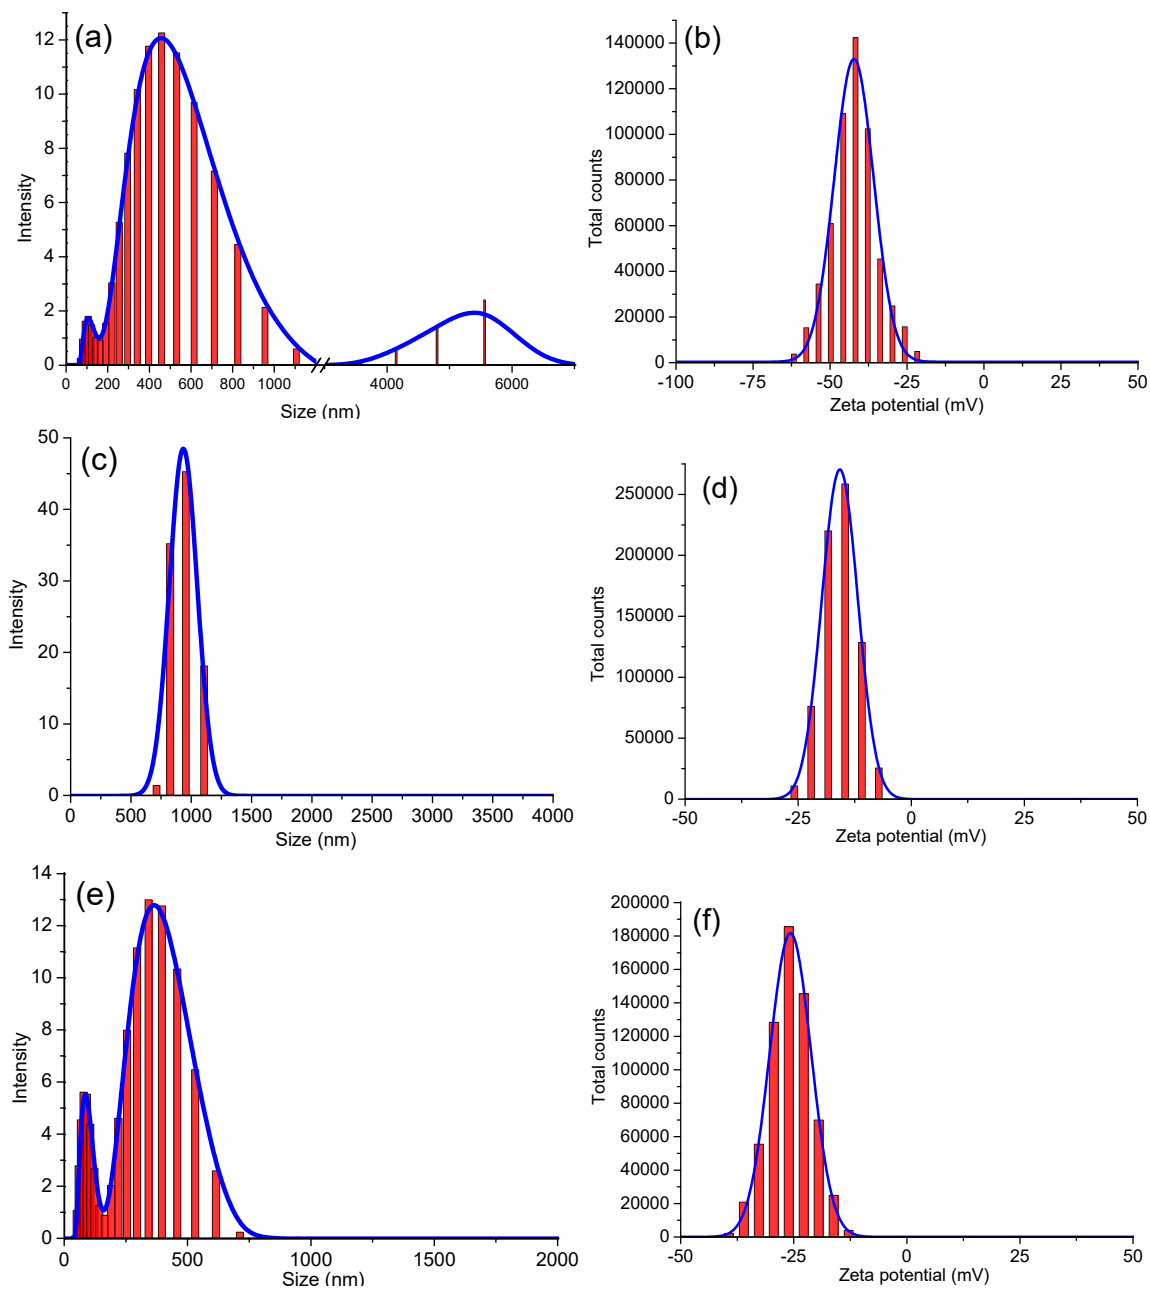

Figure S3. Hydrodynamic size distributions and zeta potentials of the nanoparticles: (a, b)  $\text{Fe}_3\text{O}_4$  (c, d)  $\text{Mn}_{0.2}\text{Fe}_{2.8}\text{O}_4$  (e, f)  $\text{Mn}_{0.5}\text{Fe}_{2.5}\text{O}_4$ .

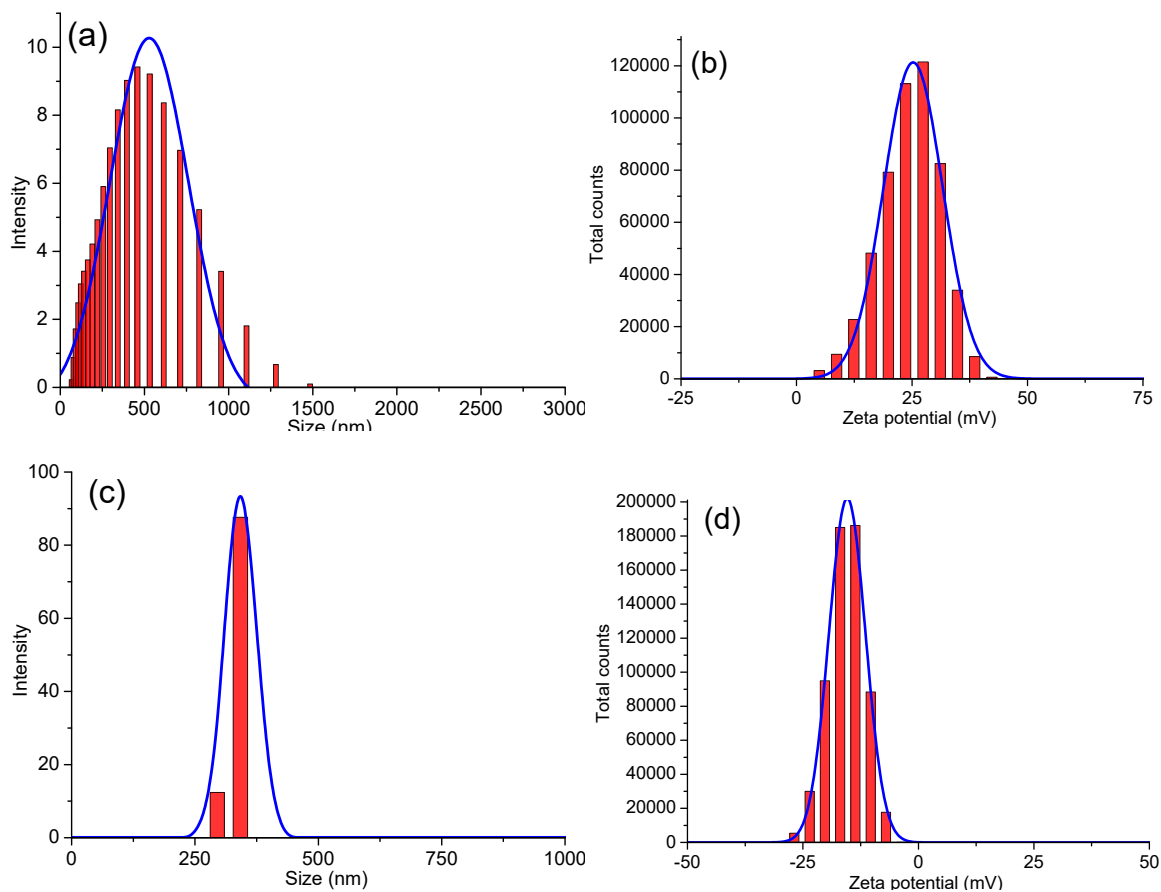

Figure S4. Hydrodynamic size distributions and zeta potentials of the nanocomposites: (a, b) Mn<sub>2</sub>Dy (Mn<sub>0.2</sub>Fe<sub>2.8</sub>O<sub>4</sub>@(Y,Dy)VO<sub>4</sub>@Chitosan) and (c, d) Mn<sub>5</sub>Eu (Mn<sub>0.5</sub>Fe<sub>2.5</sub>O<sub>4</sub>@(Y,Eu)VO<sub>4</sub>@PEG).

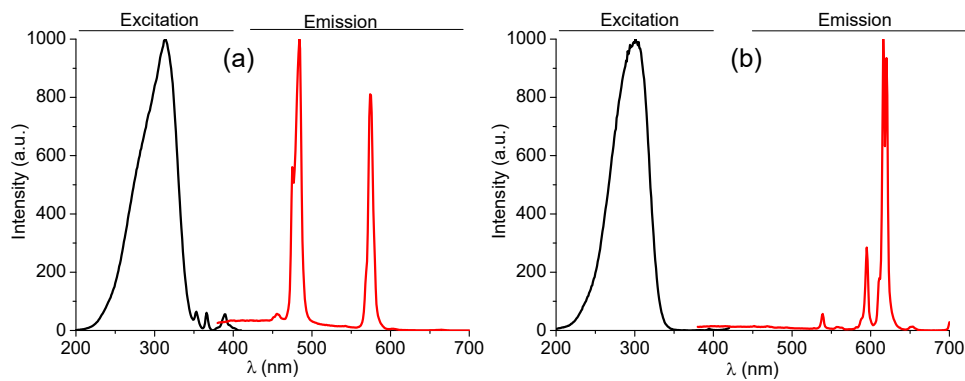

Figure S5. Luminescence excitation and emission spectra: (a) Mn<sub>2</sub>Dy (Mn<sub>0.2</sub>Fe<sub>2.8</sub>O<sub>4</sub>@(Y,Dy)VO<sub>4</sub>@Chitosan) and (b) Mn<sub>5</sub>Eu (Mn<sub>0.5</sub>Fe<sub>2.5</sub>O<sub>4</sub>@(Y,Eu)VO<sub>4</sub>@PEG) nanocomposites.

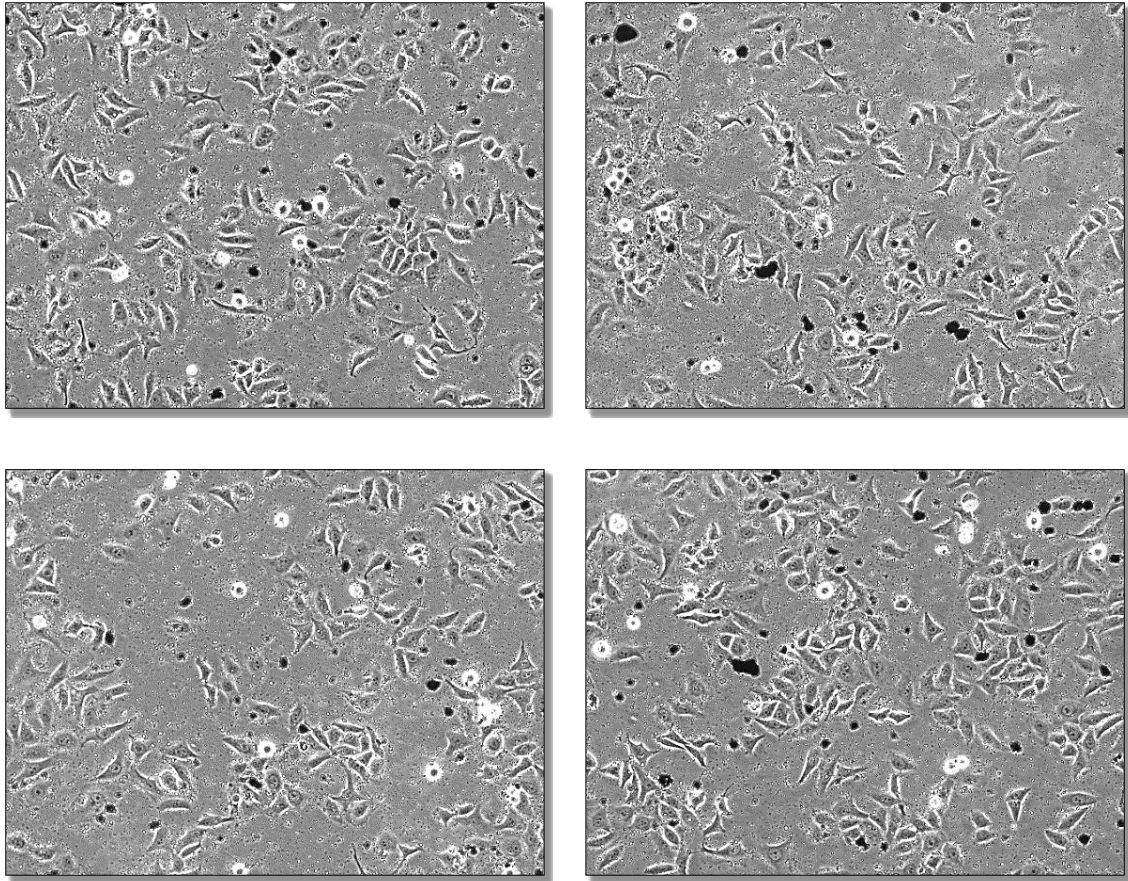

Figure S6. DIC images of the HeLa cell lines treated with  $\text{Mn}_{0.2}\text{Fe}_{2.8}\text{O}_4$  nanoparticles.

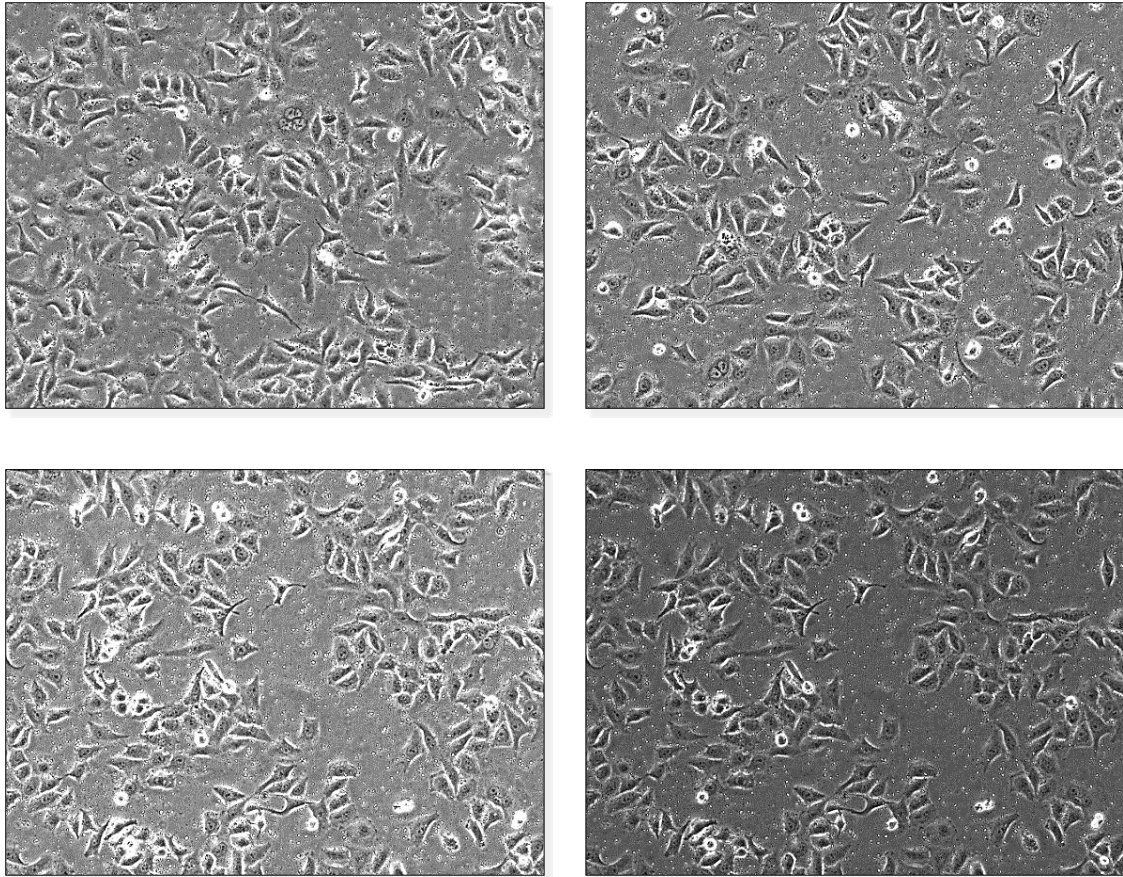

Figure S7. DIC images of the HeLa cell lines treated with  $\text{Mn}_{0.5}\text{Fe}_{2.5}\text{O}_4$  nanoparticles.

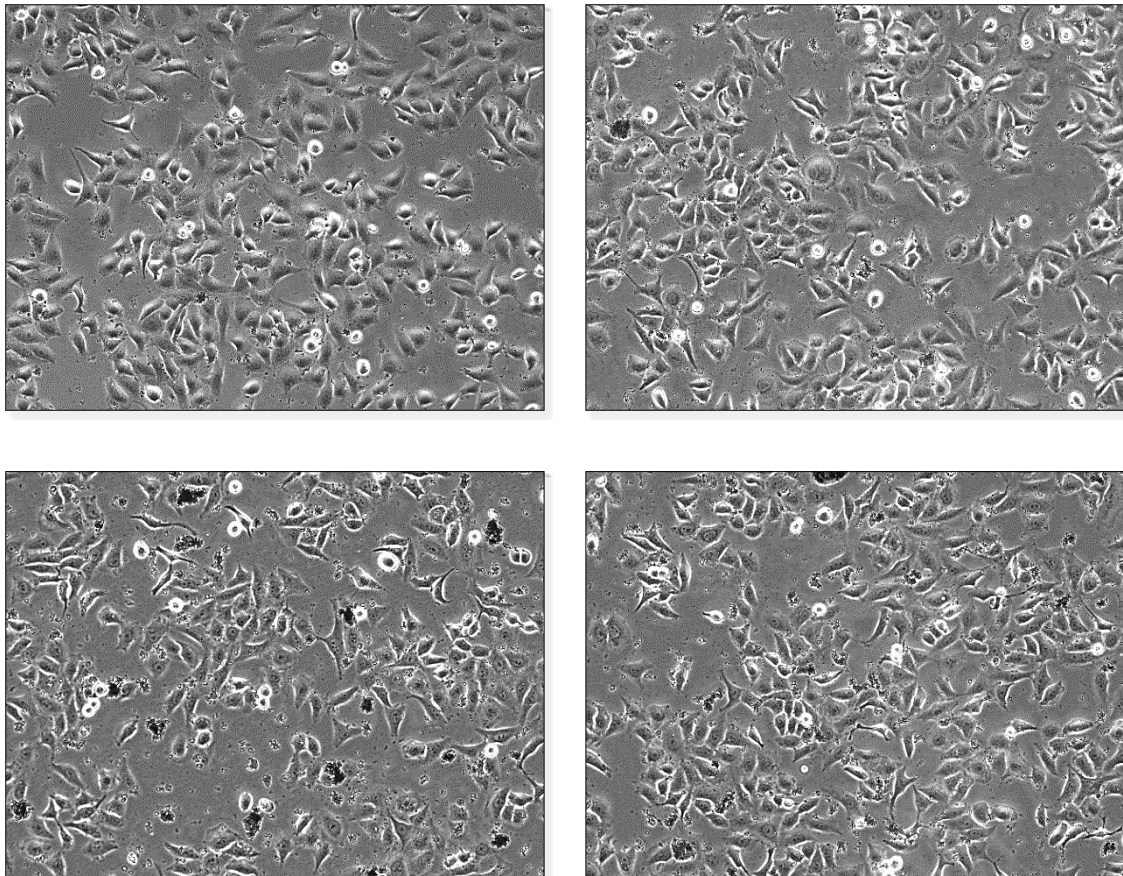

Figure S8. DIC images of the HeLa cell lines treated with Mn<sub>2</sub>Dy nanocomposite.

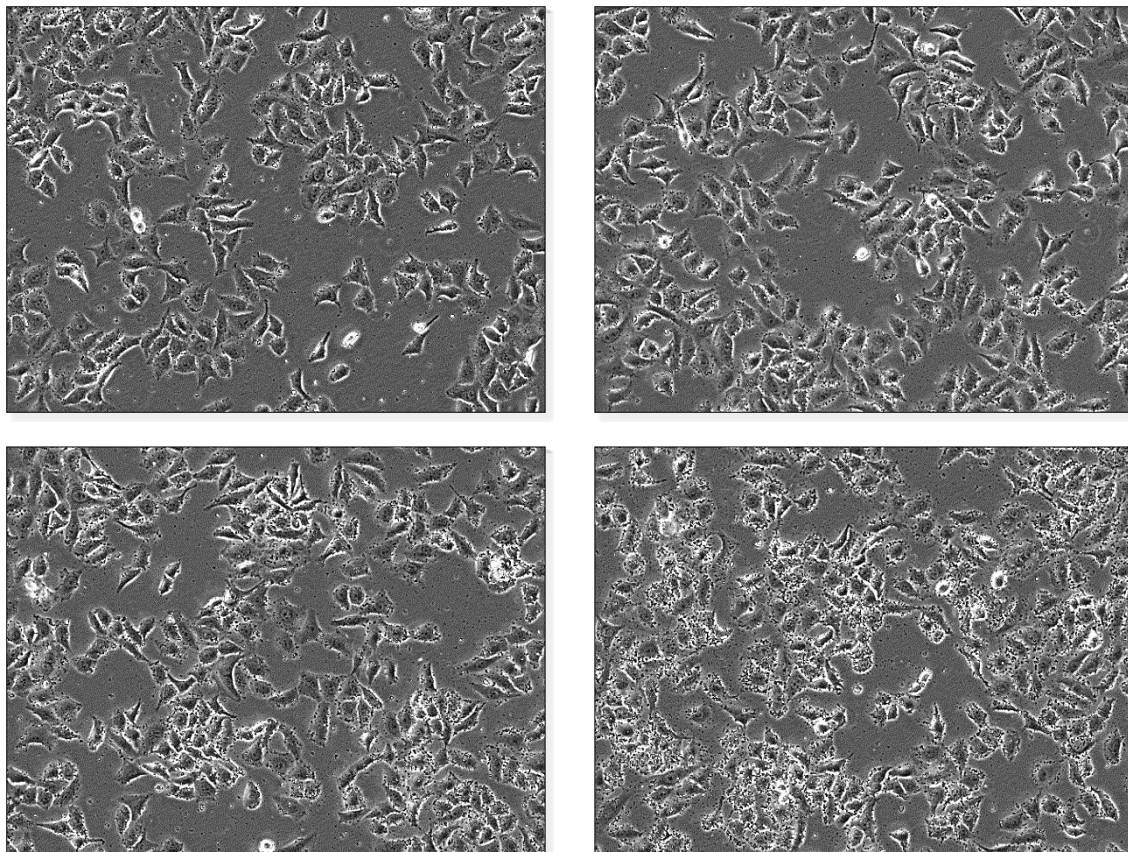

Figure S9. DIC images of the HeLa cell lines treated with Mn5Eu nanocomposite.
